# Supplementary material for: Halogenation of SiGe monolayers: robust changes in electronic and thermal transport
Source: Royal Society of Chemistry journal article supplement (doi:10.1039/c9cp03822a), 2019-01-01
Supplement: c9cp03822a1.pdf [file c9cp03822a1.pdf]

## Supplementary Material

### Halogenation of SiGe monolayer: Robust change in electronic and thermal transports

Vaishali Sharma<sup>1</sup>, Hardik L. Kagdada<sup>1</sup>, Prafulla K Jha<sup>1,#</sup>, Piotr Śpiewak<sup>2</sup>, and Krzysztof J. Kurzydłowski<sup>2,3</sup>

<sup>1</sup>Department of Physics, Faculty of Science, The Maharaja Sayajirao University of Baroda, Vadodara-390002

<sup>2</sup>Materials Design Division, Faculty of Materials Science and Engineering, Warsaw University of Technology, 141 Wołoska Str., 02-507 Warsaw, Poland

<sup>3</sup>Faculty of Mechanical Engineering, Białystok University of Technology, 45C Wiejska Str., 15-351, Białystok, Poland

#Email: [prafullaj@yahoo.com](mailto:prafullaj@yahoo.com)

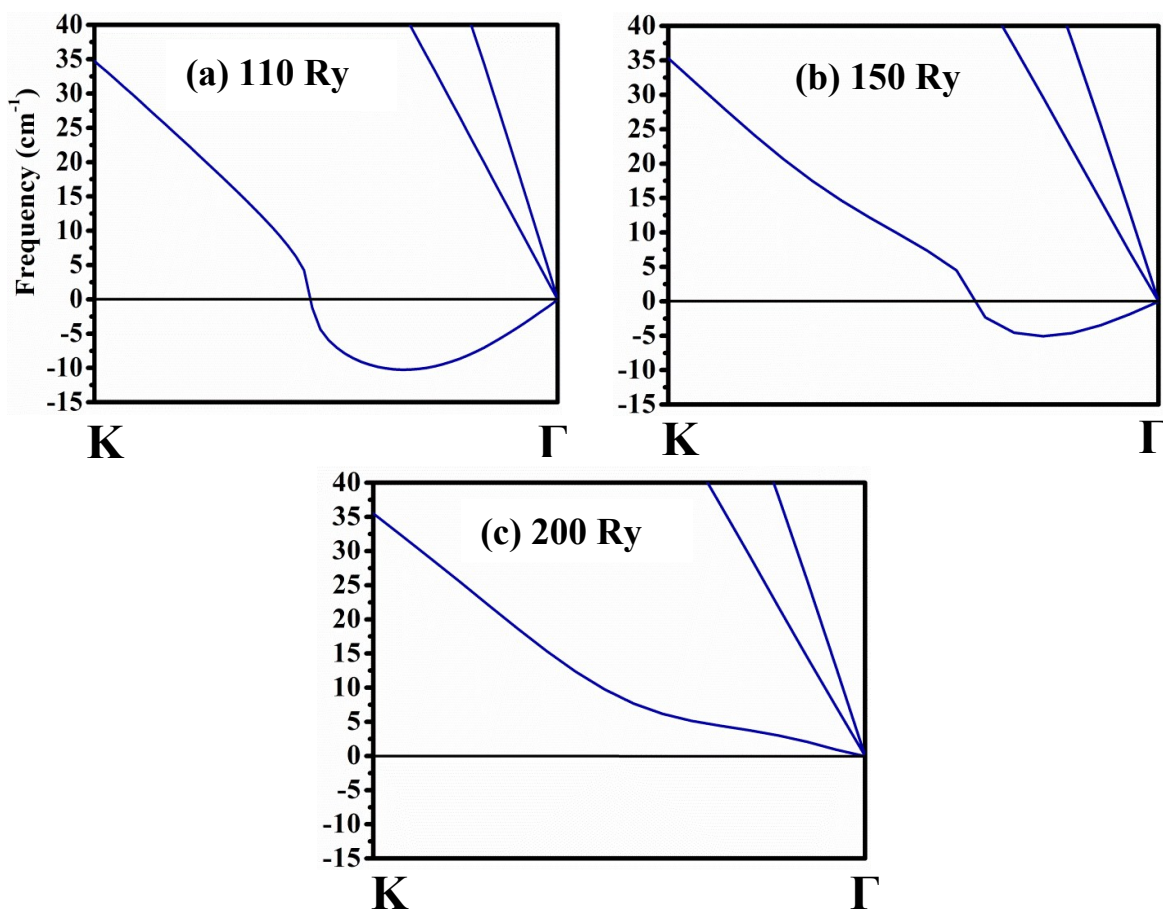

**Figure S1:** Phonon dispersion in K to  $\Gamma$  direction with different energy cut-off (a) 110Ry, (b) 150 Ry and (c) 200Ry. Increasing  $e_{\text{cut}}$  wave function for SiGe buckled monolayer leads imaginary frequency of out-of-plane ZA mode towards the real frequency. This clearly depicts that phonon calculation is a very sensitive to the structural and calculation parameters.

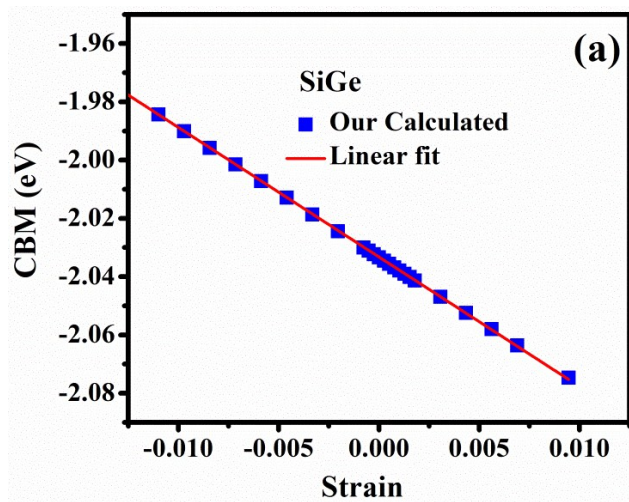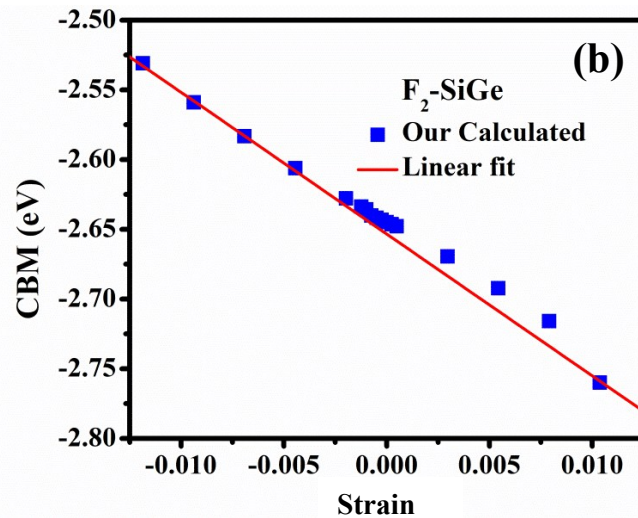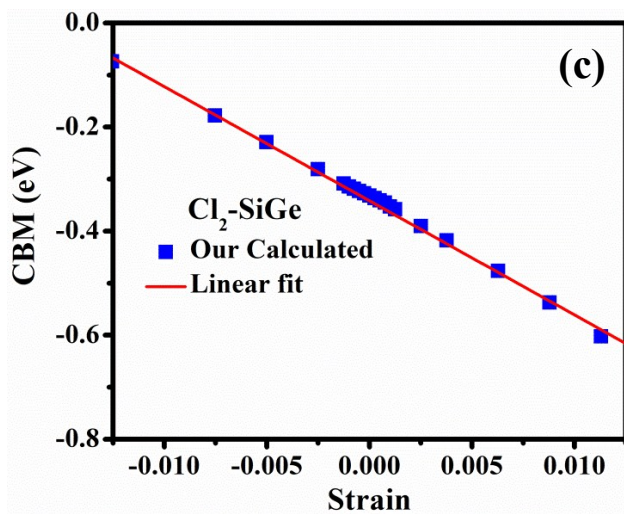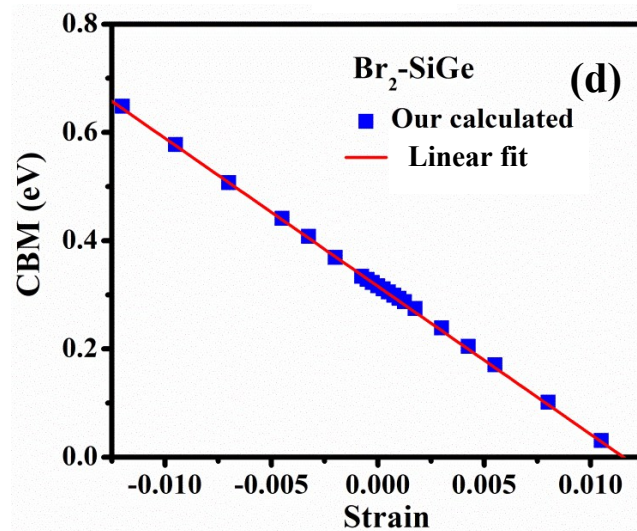

**Fig S2:** Strain versus conduction band minima (CBM) plots for (a) SiGe (b) F<sub>2</sub>-SiGe (c) Cl<sub>2</sub>-SiGe and (d) Br<sub>2</sub>-SiGe monolayer.

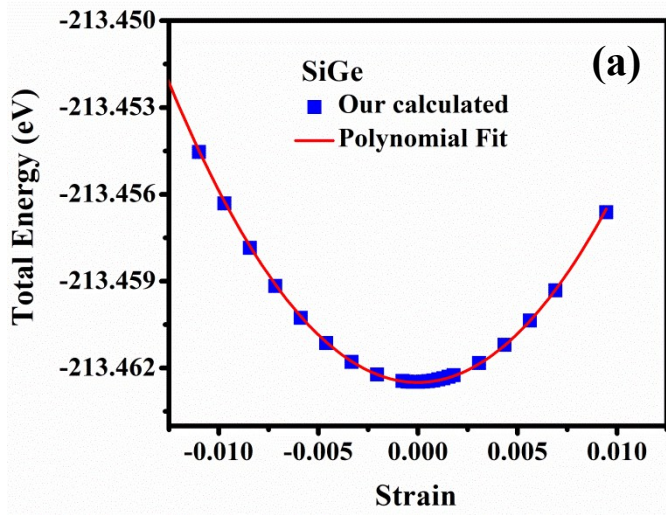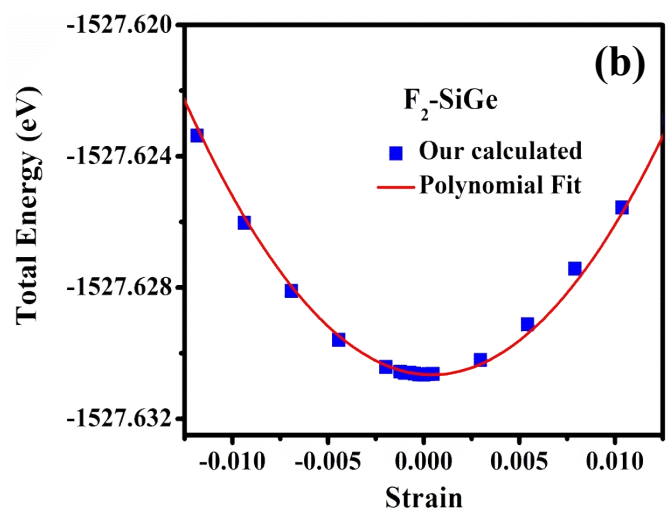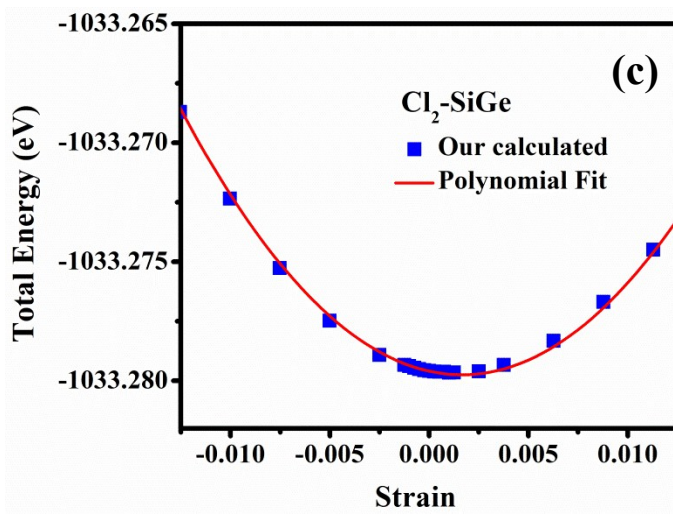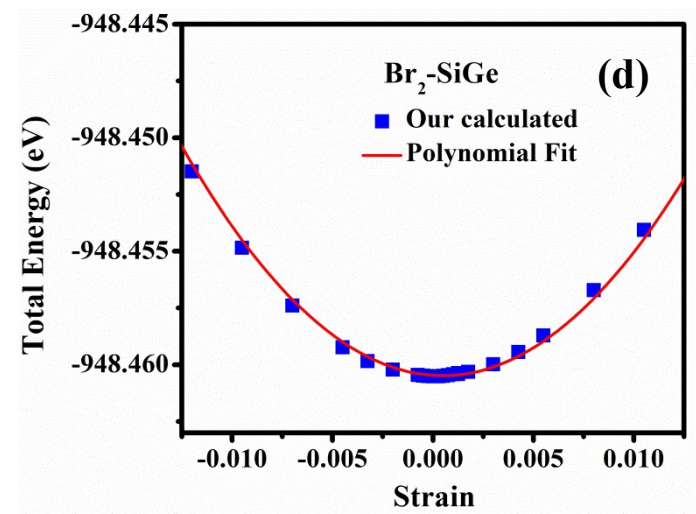

**Fig S3:** Strain versus total energy plots for (a) SiGe (b) F<sub>2</sub>-SiGe (c) Cl<sub>2</sub>-SiGe and (d) Br<sub>2</sub>-SiGe monolayer.

**Table S1:** Calculated effective mass ( $m^*$ ), 2D elastic constant ( $C^{2D}$ ), deformation potential constant ( $E_1$ ), carrier mobility ( $\mu$ ) and relaxation time ( $\tau$ ) for all considered systems at 300 K.

| System                | $m^*$ (kg) | $C^{2D}$ (N/m) | $E_1$ (eV) | $\mu$ (m <sup>2</sup> V <sup>-1</sup> s <sup>-1</sup> ) | $\tau$ (ps) |
|-----------------------|------------|----------------|------------|---------------------------------------------------------|-------------|
| SiGe                  | 2.01E-32   | 66.58          | 4.45       | 441.058                                                 | 55.42       |
| F <sub>2</sub> -SiGe  | 2.99E-32   | 49.96          | 10.17      | 0.96                                                    | 0.18        |
| Cl <sub>2</sub> -SiGe | 3.58E-32   | 55.56          | 21.94      | 0.16                                                    | 0.04        |
| Br <sub>2</sub> -SiGe | 4.23E-32   | 59.95          | 23.34      | 0.11                                                    | 0.03        |
